# Supplementary material for: C/EBPβ/AEP Signaling Regulates the Oxidative Stress in Malignant Cancers, Stimulating the Metastasis
Source: Oxford University Press journal article supplement (doi:10.1158/1535-7163.mct-21-0019), 2021-06-22
Supplement: 15357163mct210019-sup-258512_2_supp_7122652_qt9650.docx [file 15357163mct210019-sup-258512_2_supp_7122652_qt9650.docx]

**Supplementary Figure Legends**

**Supplementary Figure 1. *Lgmn* is the prognostic biomarker in TNBC patients.**

(A) *lgmn* expression in TNBC samples of TCGA (The Cancer Genome Atlas) relative to normal tissues. In the TCGA data collection, the expression *lgmn* was compared between (B) gender and (C) age. (D) Overall survival and post-progression survival in TCGA TNBC patients stratified according to *lgmn* expression. (E) Immunohistochemistry analyses of *lgmn* expression in the TNBC human tissues. Bar: 100 μm. (F) High expression of *lgmn* correlated with the cell migration pathway, as revealed using the GSE1456 datasets. NES is a normalized enrichment score.

**Supplementary Figure 2. The AEP inhibitor derivatives inhibit AEP in MDA-MB-231 cells.** (A) The IC50 curves of various AEP inhibitor derivatives against AEP activities in MDA-MB-231 cells.(B) The IC50 curves of various AEP inhibitor derivatives against caspase 3 activities in MDA-MB-231 cells. (C) The cell proliferation effect of AEP inhibitors. MDA-MB-231 cells were incubated with various concentrations (0–10 μM) of AEP inhibitors for 48 hours. Significant differences are considered as **p*<0.05; ***p*<0.01; ****p*<0.001.

**Supplementary Figure 3. The AEP inhibitor exhibits minor side effects in the MMTV-PyMT mice model.**

(A) The weight of model mice treated with CP6 (10 mg/kg) or control vehicle. (B) Histological study of hematoxylin-eosin stained tissue sections in the CP6 or vehicle-treated mice. The MMTV-PyMT mice were treated with 10 mg/kg of CP6 or control vehicle by i.p. every day for 3 months (n = 8 mice per group). Scale Bar: 100 μm. (C)IHC staining of C/EBPβ and AEP in the primary tumor and lung metastasis slides from treated with i.p. injection of CP6 (10 mg/kg) or control vehicle groups. Scale Bar: 100 μm. Data are means ± SEM (**p*<0.05, one-way ANOVA, n=3). (D) The complete blood count (CBC) test and differential blood count test after the i.p. injection of CP6 (10 mg/kg) or control vehicle groups.

**
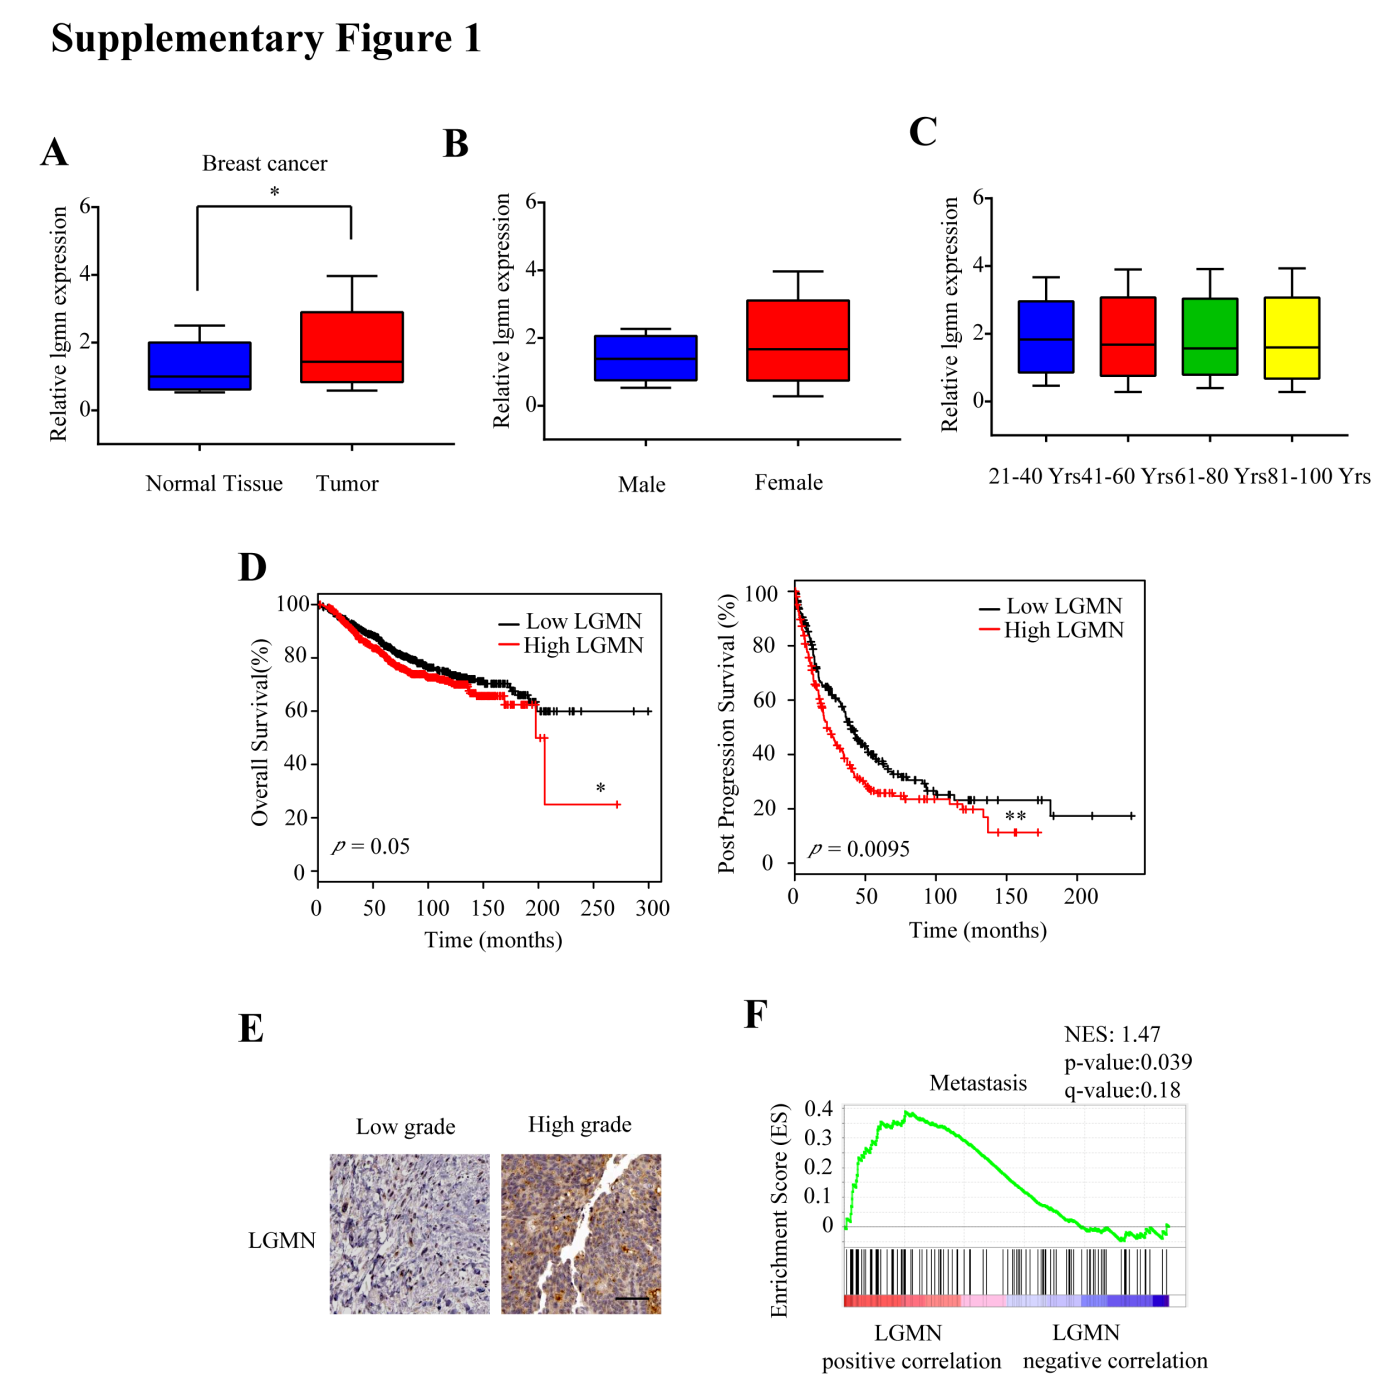
**


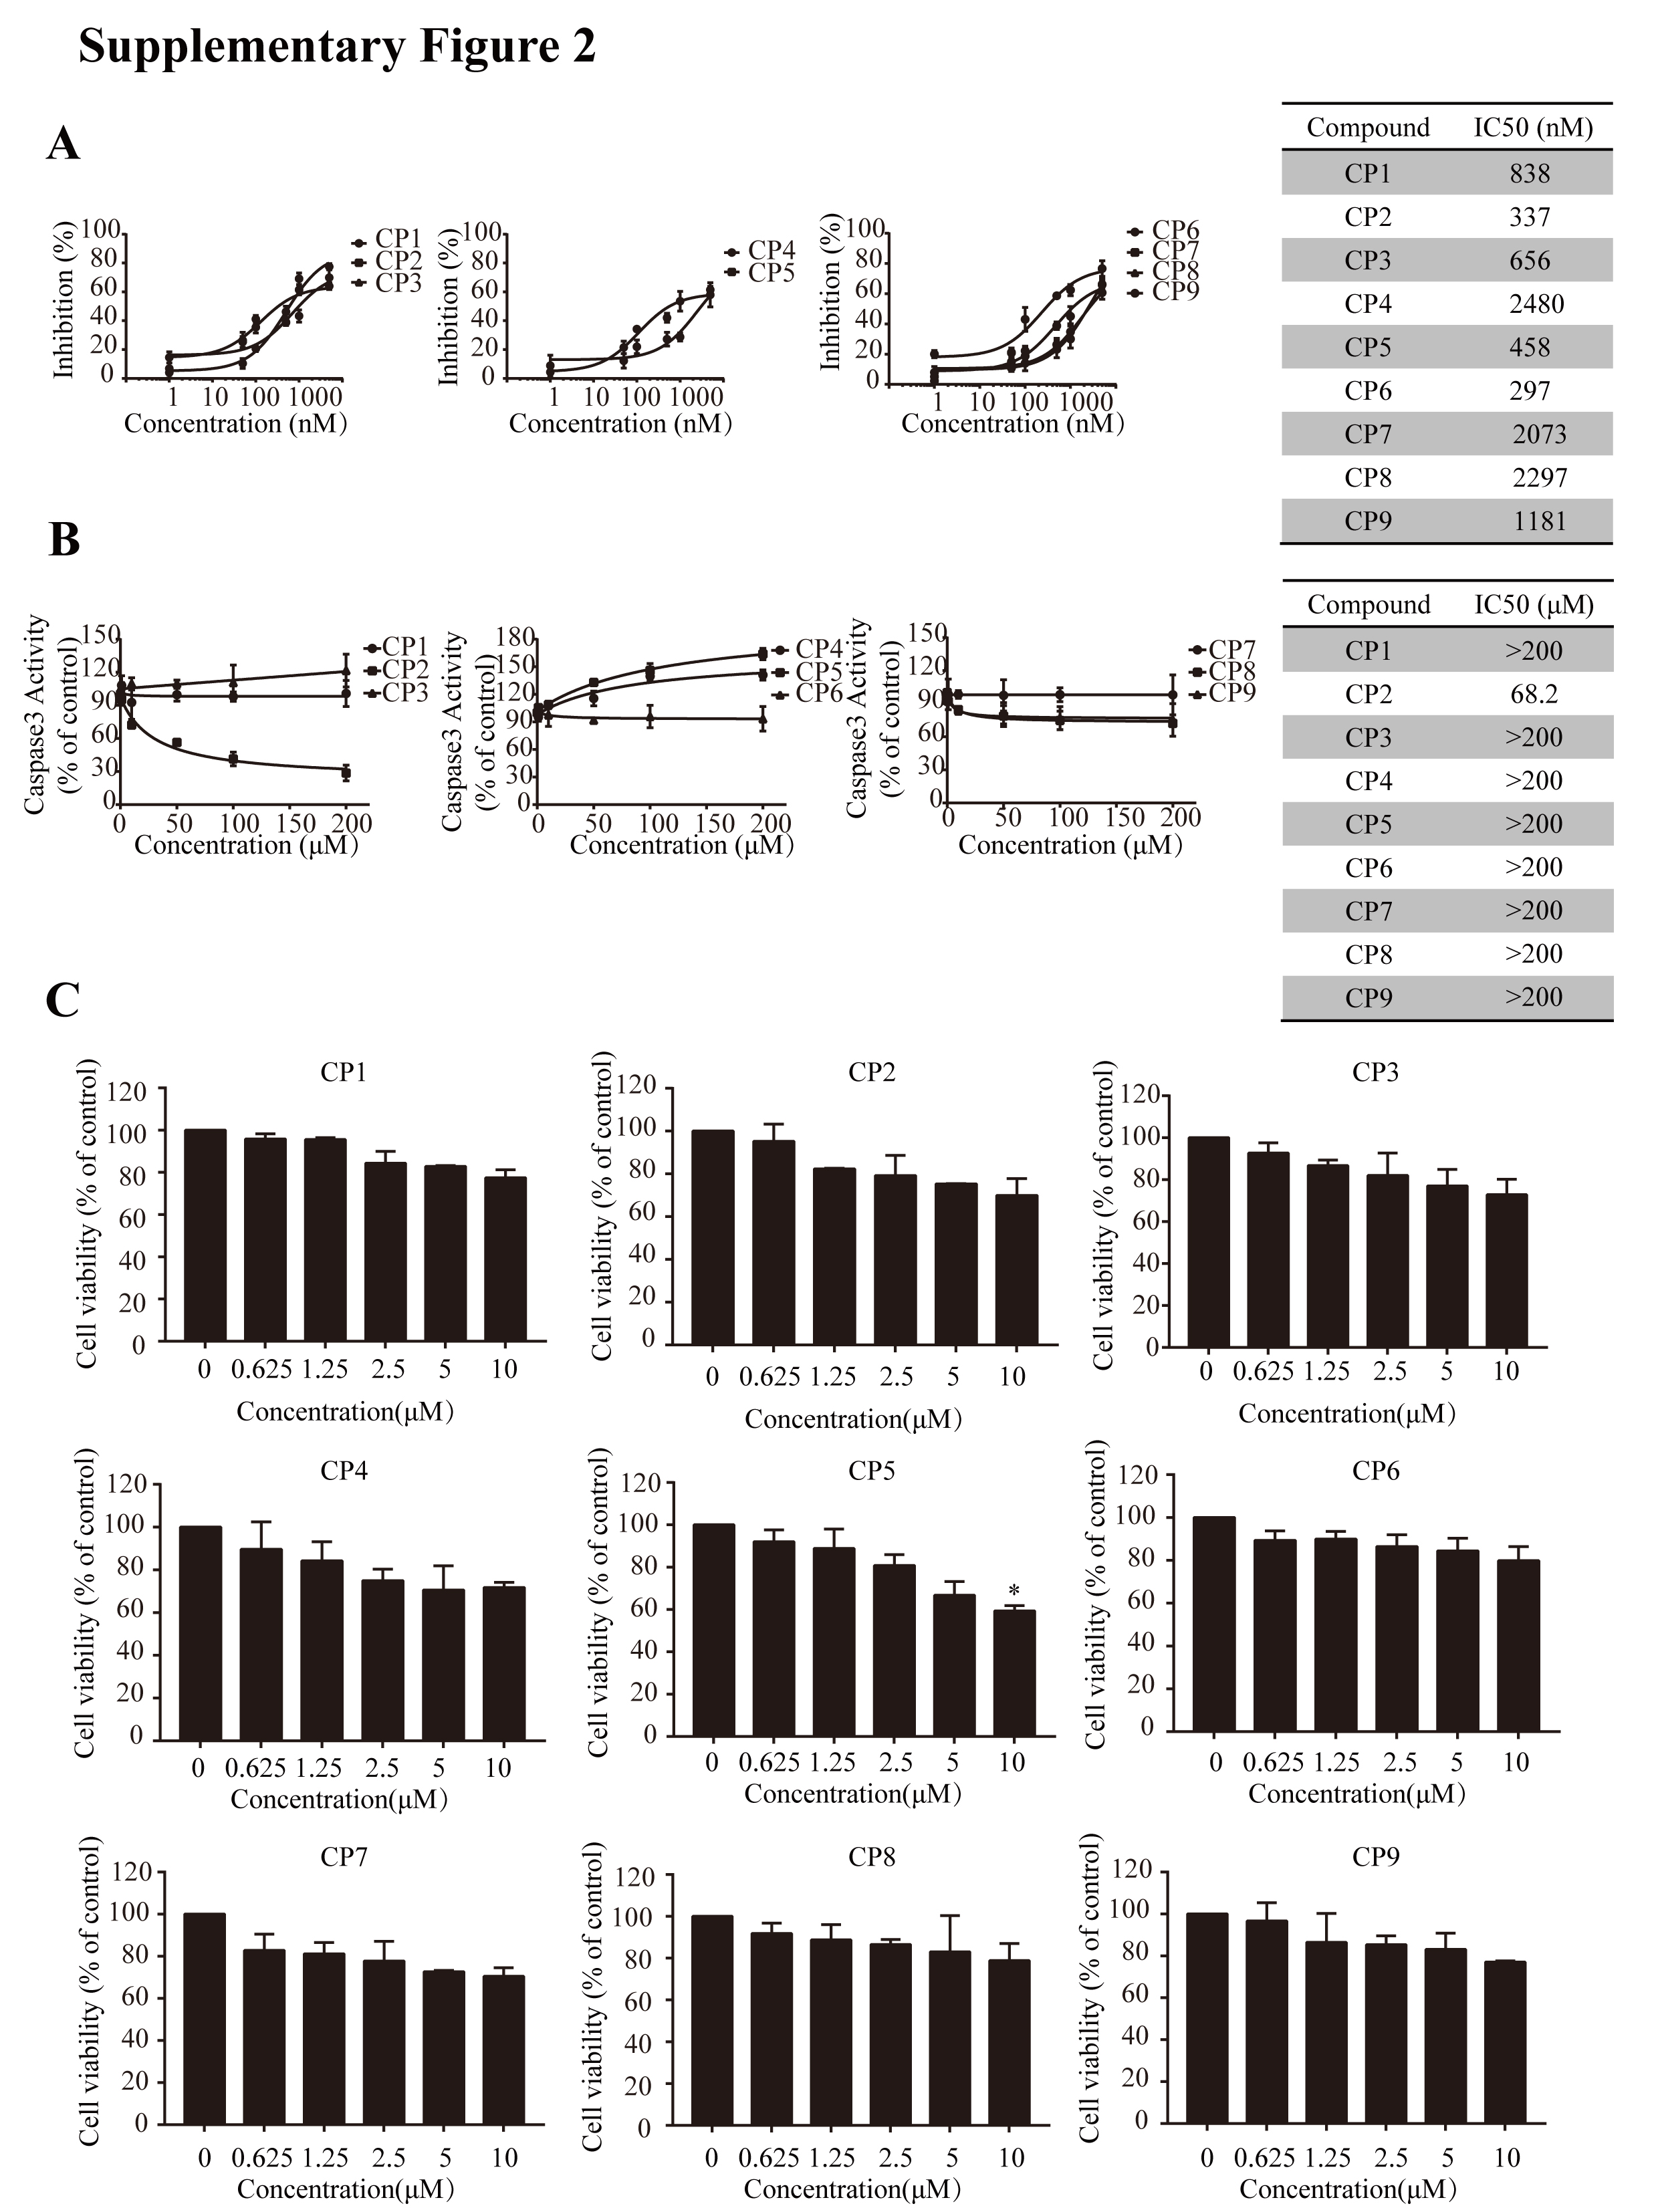


**
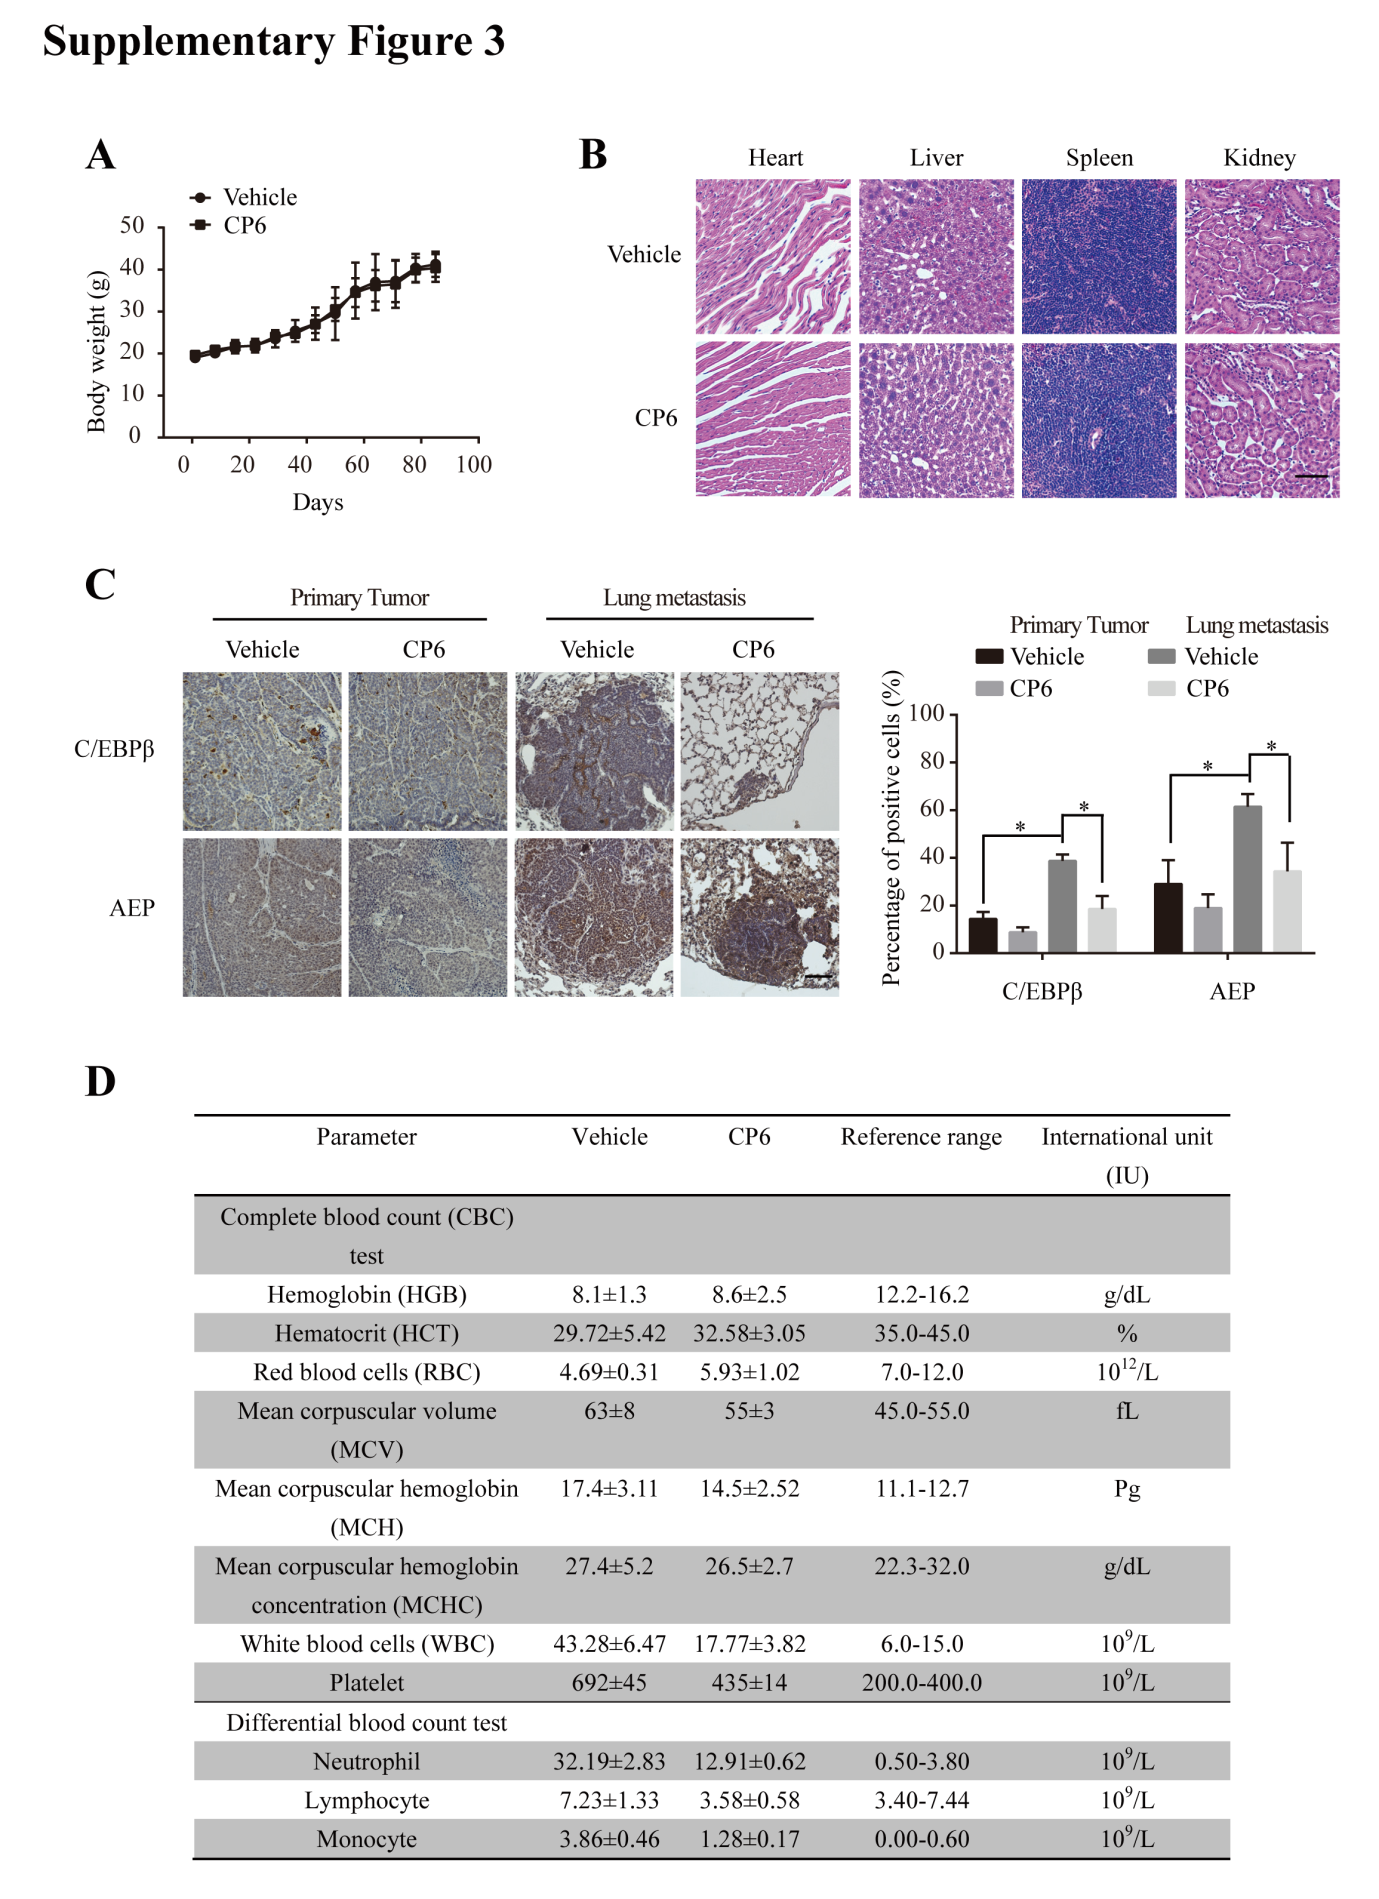
**
